# Supplementary material for: Responsive Microgels Based on Raft-Hda Dynamic Covalent Bonding
Source: Preprints.org preprint supplement (doi:10.20944/preprints202312.1552.v1), 2023-12-21
Supplement: Supplementary file 1 [file supplementary]

**Supporting Information**

**Responsive microgels based on RAFT-HDA dynamic covalent bonding**

**Jingkai Nie 1, Hang Yin 1,*, Ruyue Cao1, Changyuan Huang2, Xiang Luo2, and Jun Ji 1**

**1 State Grid Smart Grid Research Institute Co. Ltd.; zhaoweimei@geiri.sgcc.com.cn**

**2 China Electric Power Research Institute Co. Ltd.; shaoshuai@epri.sgcc.com.cn**

*** Correspondence: yinhang@geiri.sgcc.com.cn; Tel.:+86 66601587**

Keywords: responsive microgels, hetero Diels-Alder (HDA) reactions, dynamic covalent bonding


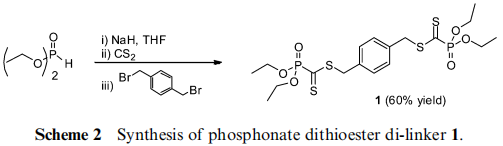


**Scheme. S1**. Synthetic routes of (a) 1,4-phenylenebis (methylene) bis((diethoxyphosphoryl)methanedithioformate) (P-Di-linker)


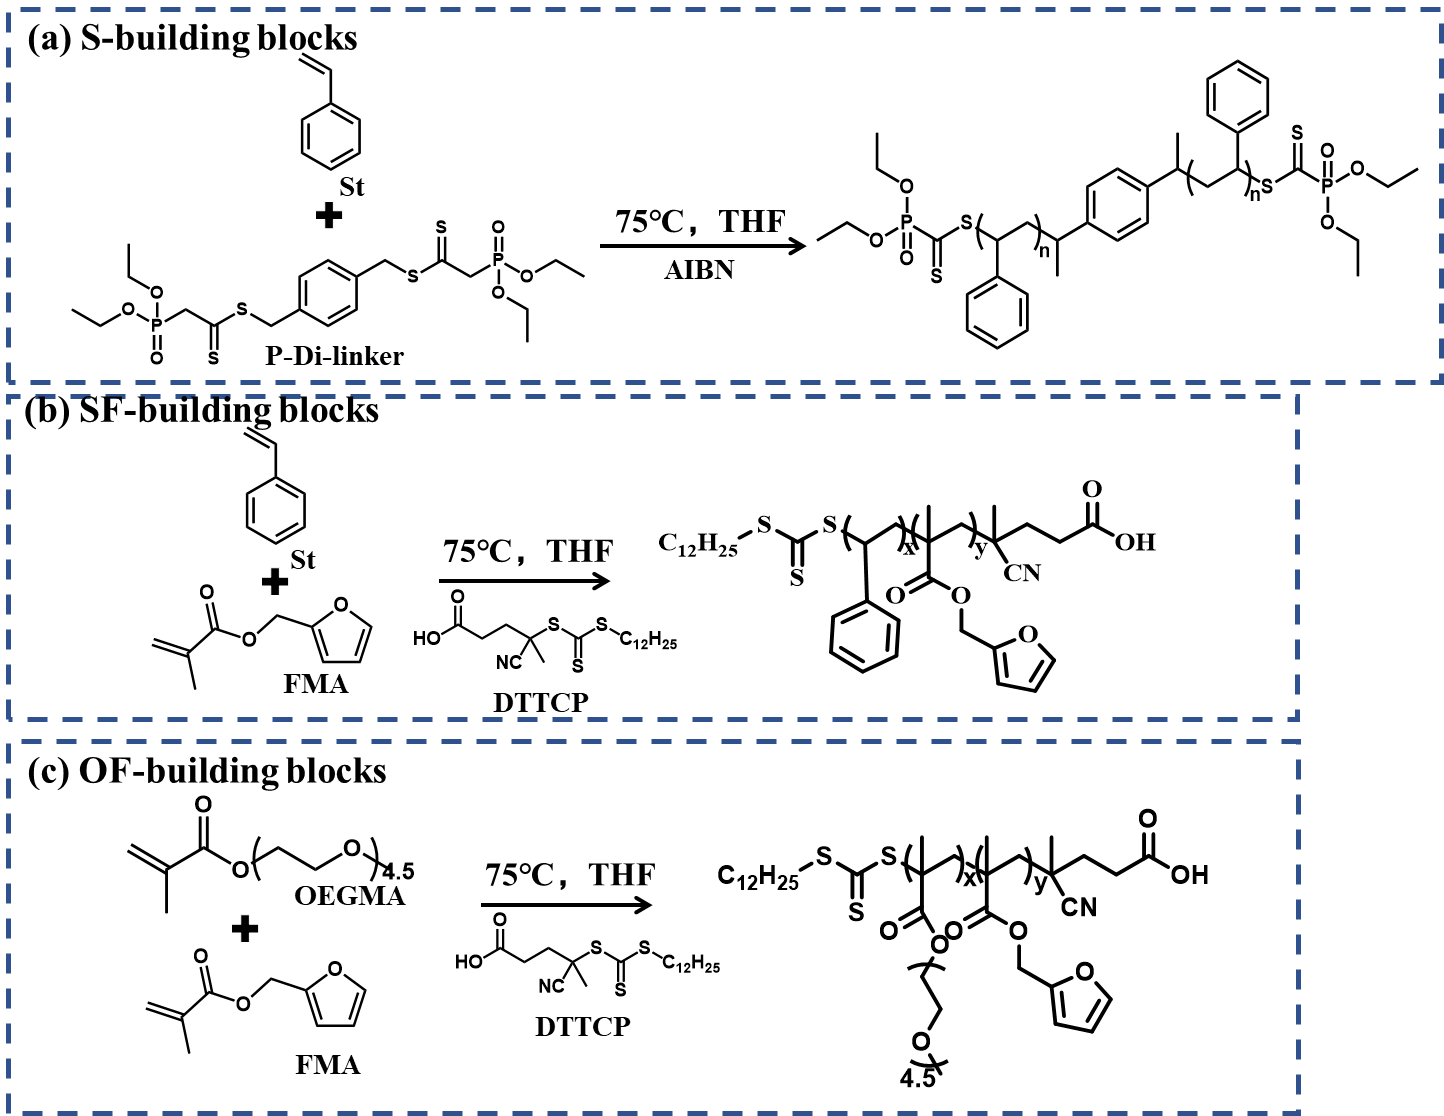


**Scheme. S2**(a-c) Synthetic routes of building blocks.


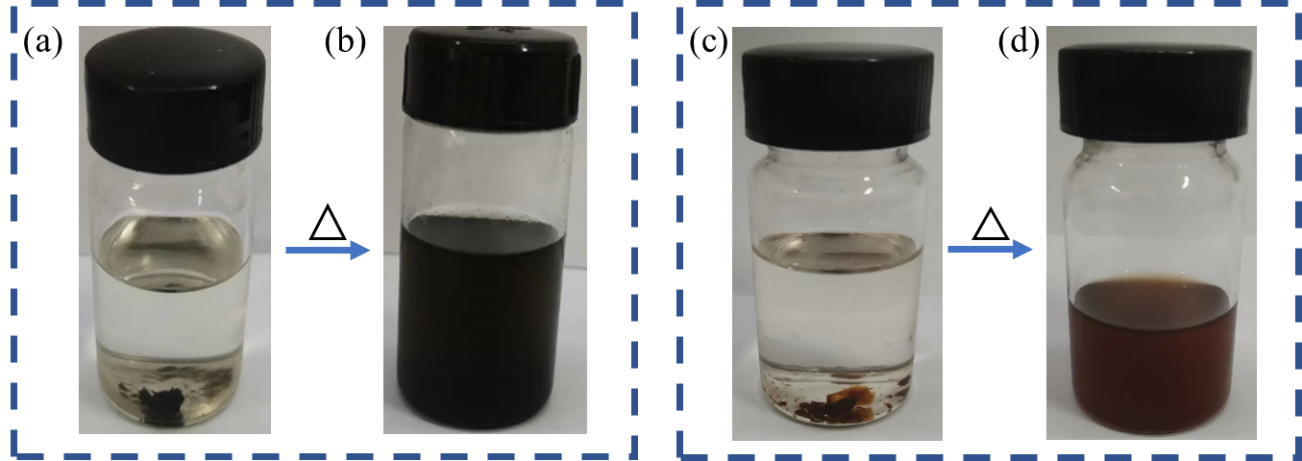


**Figure S1** (a) DA product soaked in toluene at room temperature for 5 days. (b) DA product heated in toluene 120℃ for 2h. (c) DA product soaked in THF at room temperature for 5 days. (d) DA product heated in toluene 120℃ for 8h.


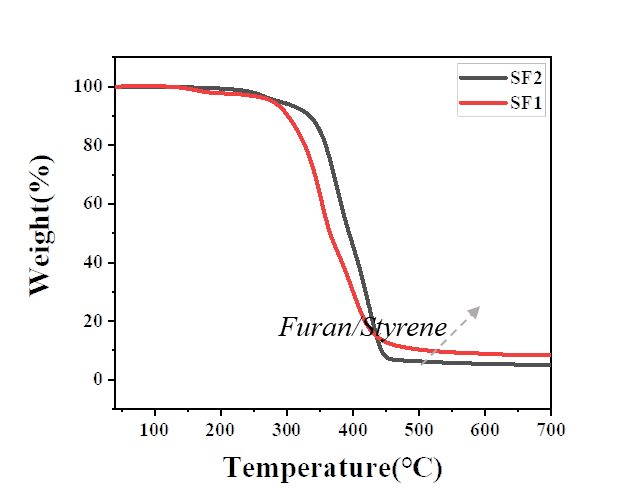


**Figure S2** Comparative thermal weight loss spectra of SF1 and SF2 systems.


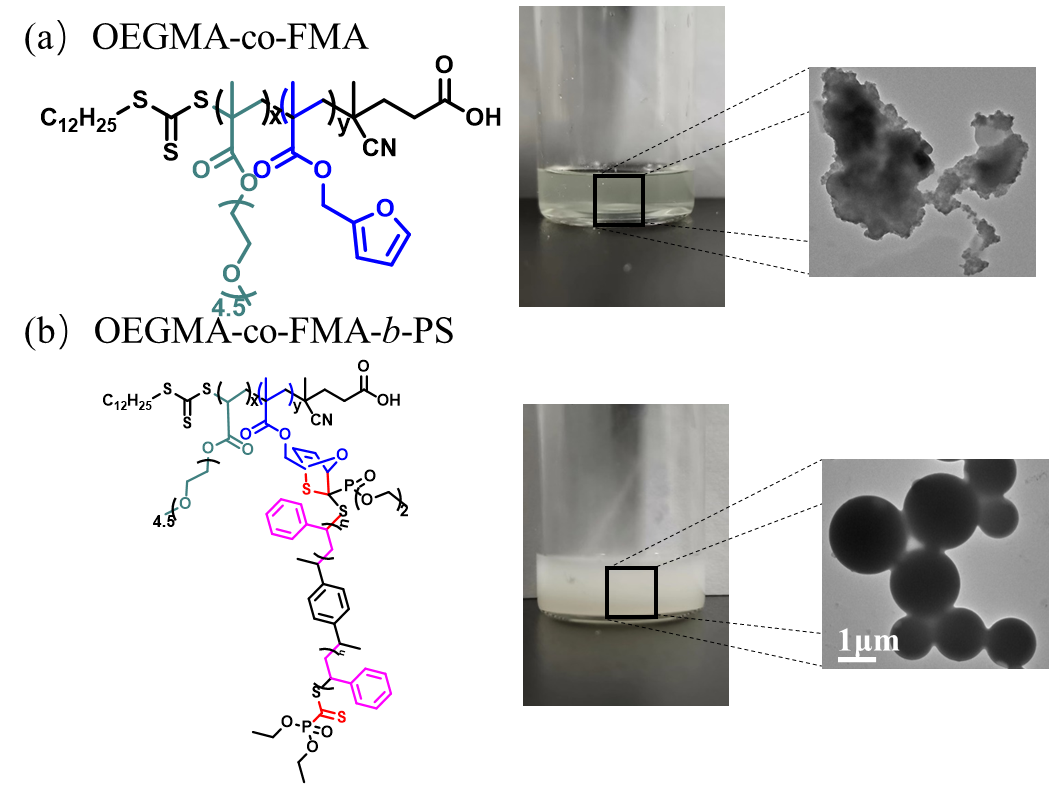


**Figure S3**(a) OEGMA and FMA copolymer. (b) Furan with dithioester HDA to obtain OEGMA-co-FMA-b-PS.


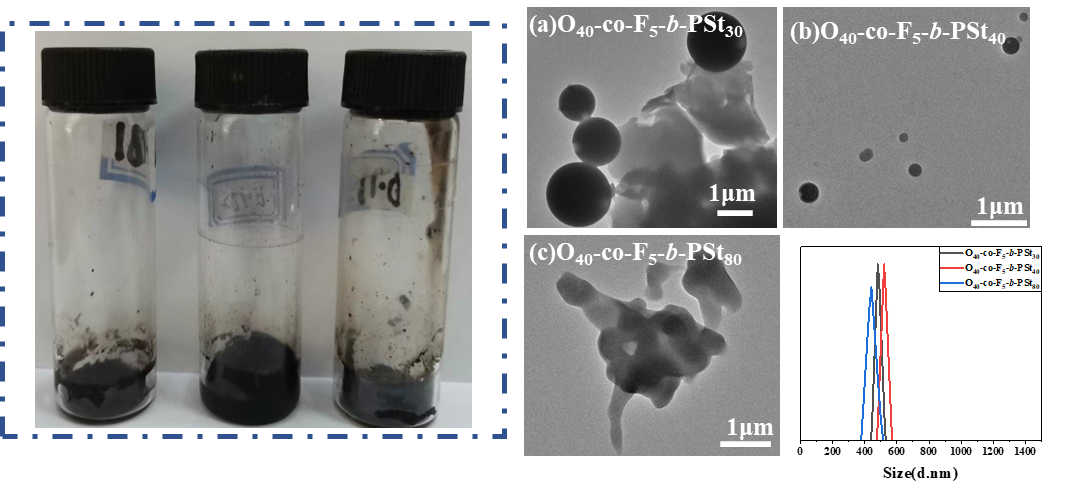


**Figure S4**


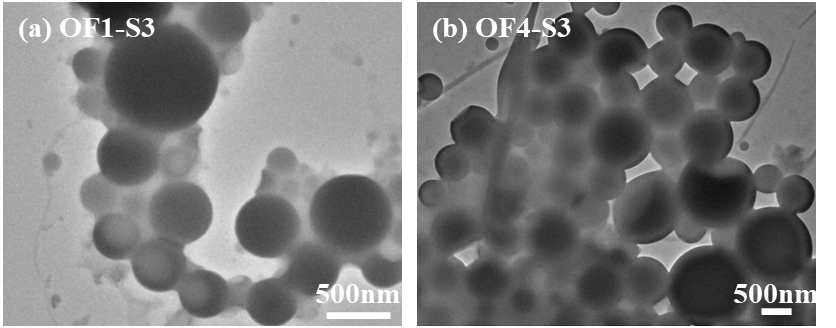


**Figure S5** TEM images of microgels after 36 days at room temperature.
